# Supplementary material
Source: PubMed Central journal article supplement (PMC7725985)
Supplement: NIHMS1590628-supplement-1.pdf [file NIHMS1590628-supplement-1.pdf]

**Supplemental Table 1.** Estimated regression coefficients are shown, with standard error estimates below. Significant sex differences, after multiple comparisons correction, were observed in 10 regions, but not in global tauopathy. For all regional differences, males had decreased tau burden as compared to females.

| Tau Differs Between Males and Females                 |                   |                     |                     |                    |                                                                          |                    |                        |                   |                   |                    |
|-------------------------------------------------------|-------------------|---------------------|---------------------|--------------------|--------------------------------------------------------------------------|--------------------|------------------------|-------------------|-------------------|--------------------|
| <i>Dependent variable:</i>                            |                   |                     |                     |                    |                                                                          |                    |                        |                   |                   |                    |
|                                                       | Cuneus            | Frontal Pole        | Lateral Occipital   | Middle Temporal    | Pars Orbitalis                                                           | Pars Triangularis  | Rostral Middle Frontal | Superior Temporal | Temporal Pole     | Global Summary     |
| Cortical Amyloid                                      | 0.036<br>(0.03)   | 0.059<br>(0.09)     | 0.118<br>(0.04)     | 0.174***<br>(0.03) | 0.053<br>(0.05)                                                          | 0.017<br>(0.05)    | 0.001<br>(0.05)        | 0.108<br>(0.04)   | 0.095<br>(0.05)   | 0.224***<br>(0.03) |
| Age                                                   | 0.004<br>(0.00)   | -0.004<br>(0.00)    | 0.006*<br>(0.00)    | 0.002<br>(0.00)    | -0.002<br>(0.00)                                                         | 0.002<br>(0.00)    | 0.002<br>(0.00)        | -0.0002<br>(0.00) | -0.0003<br>(0.00) | 0.005*<br>(0.00)   |
| Sex - Male                                            | -0.083*<br>(0.03) | -0.430***<br>(0.07) | -0.140***<br>(0.03) | -0.086*<br>(0.03)  | -0.188***<br>(0.04)                                                      | -0.149**<br>(0.04) | -0.210***<br>(0.04)    | -0.105*<br>(0.03) | -0.123*<br>(0.04) | -0.06<br>(0.02)    |
| APOEε4+                                               | -0.013<br>(0.03)  | 0.025<br>(0.09)     | 0.019<br>(0.04)     | -0.009<br>(0.03)   | 0.005<br>(0.05)                                                          | -0.013<br>(0.05)   | 0.015<br>(0.05)        | -0.016<br>(0.04)  | 0.039<br>(0.05)   | 0.006<br>(0.03)    |
| Education                                             | -0.002<br>(0.00)  | 0.01<br>(0.01)      | -0.004<br>(0.01)    | 0.0002<br>(0.00)   | -0.007<br>(0.01)                                                         | 0.005<br>(0.01)    | 0.008<br>(0.01)        | 0.003<br>(0.01)   | 0.0002<br>(0.01)  | 0.002<br>(0.00)    |
| Male:APOEε4+                                          | 0.048<br>(0.04)   | 0.191<br>(0.12)     | -0.03<br>(0.06)     | 0.004<br>(0.05)    | 0.034<br>(0.07)                                                          | 0.004<br>(0.07)    | 0.01<br>(0.07)         | 0.044<br>(0.05)   | -0.026<br>(0.07)  | -0.007<br>(0.04)   |
| Intercept                                             | -0.014<br>(0.13)  | 0.148<br>(0.36)     | -0.129<br>(0.16)    | 0.067<br>(0.13)    | 0.508<br>(0.19)                                                          | 0.027<br>(0.19)    | -0.174<br>(0.21)       | 0.049<br>(0.15)   | 0.073<br>(0.19)   | -0.237<br>(0.12)   |
| Observations                                          | 132               | 132                 | 132                 | 132                | 132                                                                      | 132                | 132                    | 132               | 132               | 132                |
| R <sup>2</sup>                                        | 0.164             | 0.28                | 0.323               | 0.325              | 0.225                                                                    | 0.171              | 0.24                   | 0.171             | 0.163             | 0.468              |
| Adjusted R <sup>2</sup>                               | 0.124             | 0.245               | 0.29                | 0.293              | 0.188                                                                    | 0.131              | 0.204                  | 0.131             | 0.123             | 0.443              |
| F Statistic (df = 6; 125)                             | 4.093*            | 8.094***            | 9.929***            | 10.053***          | 6.039***                                                                 | 4.291*             | 6.588***               | 4.289*            | 4.070*            | 18.352***          |
| <i>Note: Bonferroni Correction for 35 comparisons</i> |                   |                     |                     |                    | *p<0.05; **p<0.01; ***p<0.001, after correction for multiple comparisons |                    |                        |                   |                   |                    |
